# Supplementary material for: Functional data analysis to quantify and investigate controls on and changes in baseflow seasonality
Source: Copernicus journal article supplement (doi:10.5194/hess-2023-202), 2023-08-29
Supplement: Supplementary file 1 [file hess-2023-202-supplement.pdf]

# **Supplementary information: Functional data analysis to quantify and investigate controls on and changes in baseflow seasonality**

Kathryn A Leeming<sup>1</sup>, John P Bloomfield<sup>2</sup>, Gemma Coxon<sup>3</sup> and Yanchen Zheng<sup>3</sup>

<sup>1</sup> British Geological Survey, Keyworth, NG12 5GG, UK

5 <sup>2</sup> British Geological Survey, Wallingford, OX10 8BB, UK

<sup>3</sup> School of Geographical Sciences, University of Bristol, Bristol, BS8 1SS, UK

*Correspondence to:* Kathryn A. Leeming (kle@bgs.ac.uk)

**S1 Precipitation, temperature, and effective rainfall results**

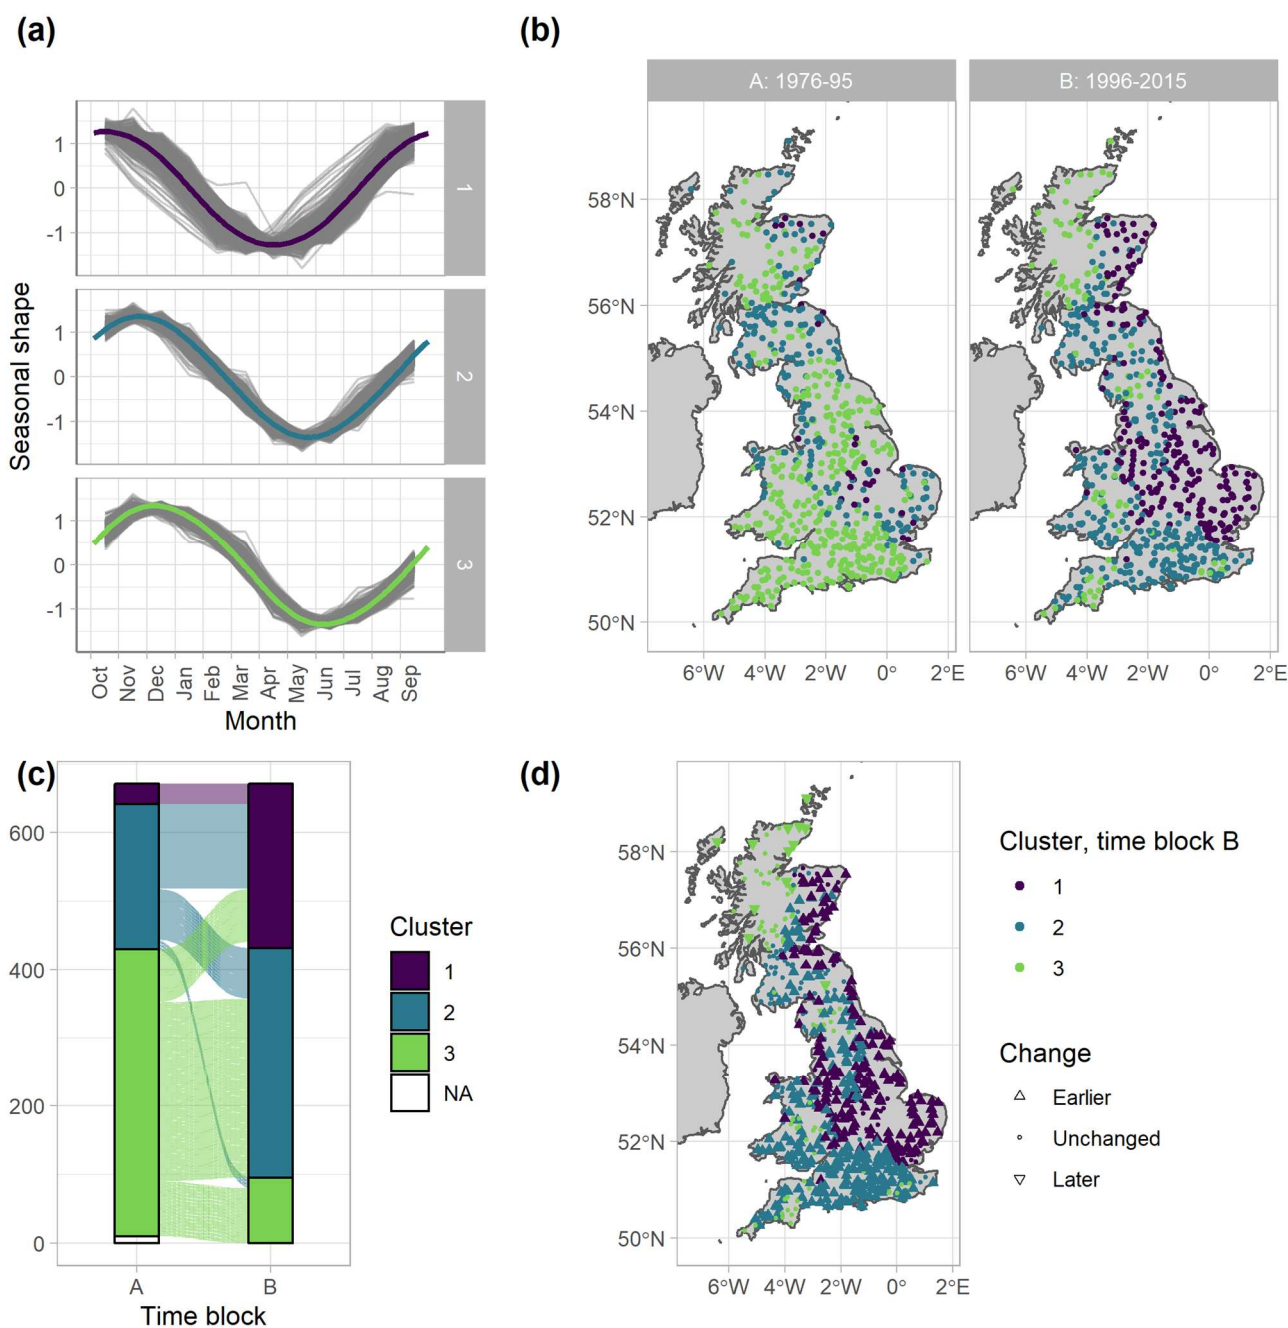

**Figure S1: FDA clustering result for 6-month smoothed precipitation (median). (a)** Median annual smoothed precipitation for each location and time block plotted by cluster (grey lines), with the cluster means overlaid (in cluster colour and bold). **(b)** Cluster membership of each location within each time block. **(c)** Flow diagram of each location showing cluster membership over the time blocks. Each location is a thin line within the plot. **(d)** Map showing the cluster membership of each location in time block B (shown by colour), with triangular symbols for those locations in an earlier or later cluster compared to time block A.

| Cluster | Block A | Block B |
|---------|---------|---------|
| 1       | 30      | 240     |
| 2       | 212     | 336     |
| 3       | 419     | 95      |

**Table S1: Number of locations assigned to each precipitation cluster within each time block.**

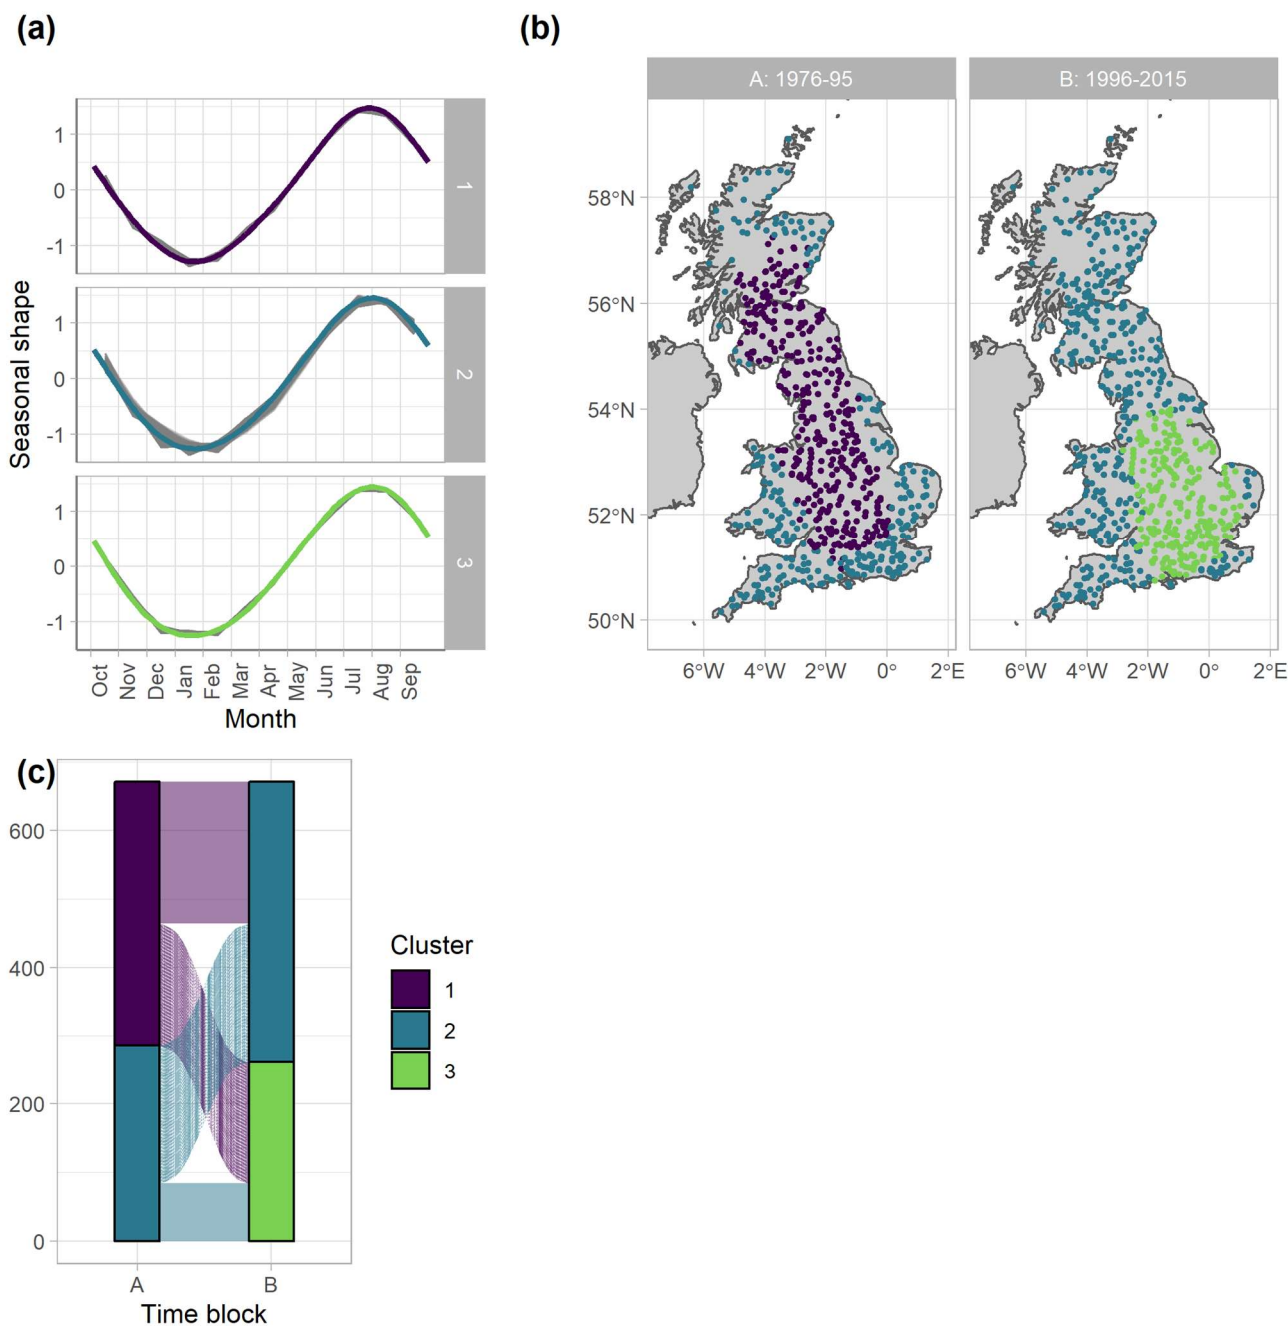

**Figure S2: FDA clustering result for temperature (median).** (a) Median annual temperature for each location and time block plotted by cluster (grey lines), with the cluster means overlaid (in cluster colour and bold). (b) Cluster membership of each location within each time block. (c) Flow diagram of each location showing cluster membership over the time blocks. Each location is a thin line within the plot. Subplot (d) is not included because the clusters have little difference in seasonal timing.

| Cluster | Block A | Block B |
|---------|---------|---------|
| 1       | 385     | 0       |
| 2       | 286     | 409     |
| 3       | 0       | 262     |

25 **Table S2: Number of locations assigned to each temperature cluster within each time block.**

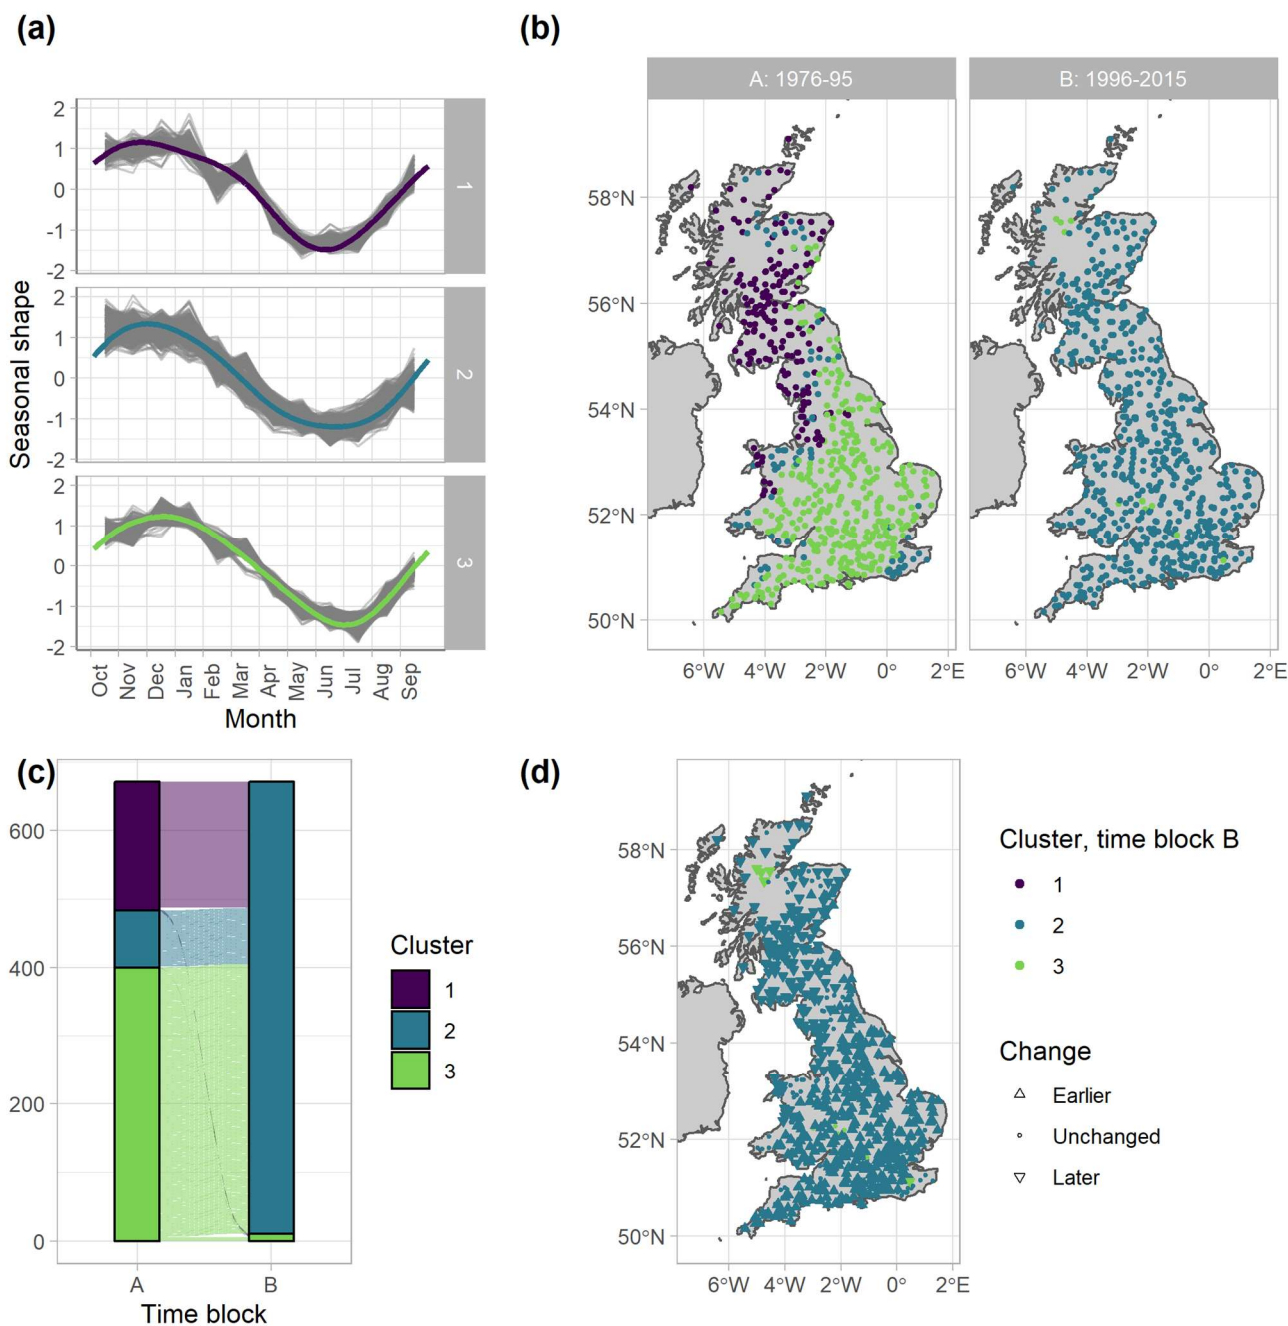

**Figure S3: FDA clustering result for effective rainfall (median).** (a) Median annual effective rainfall for each location and time block plotted by cluster (grey lines), with the cluster means overlaid (in cluster colour and bold). (b) Cluster membership of each location within each time block. (c) Flow diagram of each location showing cluster membership over the time blocks. Each location is a thin line within the plot. (d) Map showing the cluster membership of each location in time block B (shown by colour), with triangular symbols for those locations in an earlier or later cluster compared to time block A.

| Cluster | Block A | Block B |
|---------|---------|---------|
| 1       | 188     | 0       |
| 2       | 83      | 660     |
| 3       | 400     | 11      |

**Table S3: Number of locations assigned to each effective rainfall cluster within each time block.**

## 35 S2 Paired catchments

Three pairs of catchments with different cluster allocations and changes in cluster allocation (one catchment in each pair moves to an earlier baseflow cluster and one does not) are selected to consider the controls on the annual shapes in baseflow and the changes over the time blocks. The three pairs of catchments are: catchments 37008 and 37020, 33020 and 33012, and 45004 and 45005, and are marked on Fig. 1(a). These were chosen based on several principles: (a) adjacent and nearby catchments were preferable; (b) each pair has rather similar catchment attributes in terms of climate (e.g., the differences of annual precipitation and PET should be within 10 %), topography, land cover and geology etc., yet with different cluster memberships over the time blocks; (c) catchment pairs with less human activities (no reservoir and urban percentage < 10 %) or under similar human influences are selected. The key catchment attributes of selected pairs and their cluster allocations over time blocks are presented in Table S4 and the respective pairs of standardised seasonal baseflow curves are shown in Fig. S4.

Regardless of whether a catchment in each pair moves to an earlier baseflow cluster or not, both seasonal baseflow curves in each pair are similar in form suggesting that the selection of catchment pairs is adequately robust. However, there are changes in baseflow curves over time in all the catchments that appear to be independent of the range of catchment characteristics sampled by the catchment pairs. Although the pairs are chosen so that one catchment in each pair moves to an earlier functional seasonal cluster and one does not, all catchments exhibit an earlier seasonality when details of the monthly curves are considered (Fig. S4). In the case of one catchment in each pair, these changes are smaller than would result in a change in cluster allocation, and reflect the clustering being a discretisation of the functional space of annual curves. From these observations we infer that: i.) catchment characteristics may not have a first order effect on changes in baseflow seasonality in these catchments (and by extension in the wider population of catchments that move to earlier baseflow seasonality), and ii.) that increased temporal granularity (beyond early-, mid-, and late-season functional clusters) may be useful in exploring controls on changes in baseflow seasonality.

**Table S4. Key catchment attributes of selected catchment pairs and their cluster allocations over time blocks.**

| ID, station | Cluster allocations over time blocks | Area (km <sup>2</sup> ) | Aridity (-) | BFI (-) | Mean annual precipitation (mm) | Mean annual PET (mm) | Mean elevation (m.a.s.l) | Urban percent (%) | Surface. abs (mm/d) | Ground-water.abs (mm/d) |
|-------------|--------------------------------------|-------------------------|-------------|---------|--------------------------------|----------------------|--------------------------|-------------------|---------------------|-------------------------|
|-------------|--------------------------------------|-------------------------|-------------|---------|--------------------------------|----------------------|--------------------------|-------------------|---------------------|-------------------------|

|                                              |                              |        |      |      |      |     |     |      |       |       |
|----------------------------------------------|------------------------------|--------|------|------|------|-----|-----|------|-------|-------|
| 37008<br>(Chelmer at<br>Springfield)         | Moves from<br>cluster 3 -> 2 | 190    | 0.89 | 0.57 | 601  | 532 | 77  | 8.0  | 0.002 | 0.015 |
| 37020<br>(Chelmer at<br>Felstead)            | Stays in cluster 2           | 133    | 0.88 | 0.49 | 608  | 533 | 86  | 5.5  | 0.001 | 0.022 |
| 33020<br>(Alconbury<br>Brook at<br>Brampton) | Moves from<br>cluster 3 -> 2 | 213    | 0.92 | 0.26 | 582  | 533 | 47  | 4.7  | 0     | 0     |
| 33012 (Kym<br>at Meagre<br>Farm)             | Stays in cluster 2           | 138    | 0.88 | 0.25 | 606  | 531 | 61  | 2.9  | 0     | 0     |
| 45004 (Axe<br>at Whitford)                   | Moves from<br>cluster 2 -> 1 | 289    | 0.5  | 0.49 | 1052 | 530 | 138 | 2.8  | 0.026 | 0.007 |
| 45005 (Otter<br>at Dotton)                   | Stays in cluster 2           | 202.83 | 0.53 | 0.53 | 1006 | 529 | 144 | 4.61 | 0.003 | 0.038 |

Note: PET denotes potential evapotranspiration. Surface.abs represents the mean surface water abstraction, whereas  
60 groundwater.abs denotes the mean groundwater abstraction.

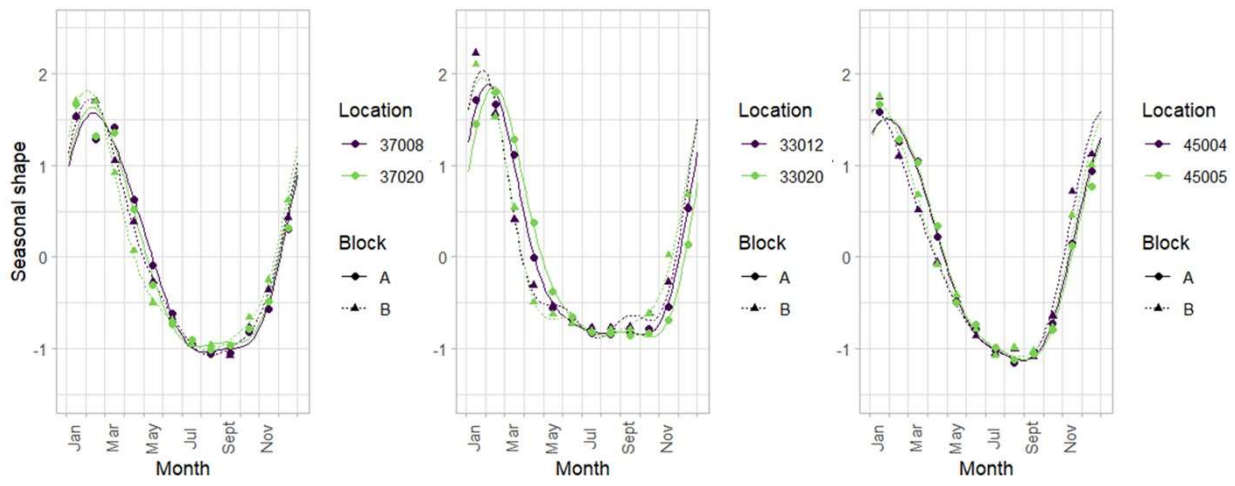

**Fig S4 Paired catchments showing the average annual baseflow (points) and fitted curves (lines) over the two time blocks for the paired catchments.**
